# Supplementary material for: Comparative Phenolic Profiles of Monovarietal Wines from Different Croatian Regions
Source: MDPI journal article supplement (doi:10.3390/app13053031), 2023-02-27
Supplement: s1 [file s1]

**Table S1.** Meteorological data from June to September 2007, collected from the meteorological stations near the vineyards where the grapes were grown.

| Meteorological station | Climatic region | Average monthly temperature (°C) |      |      |      |         | Monthly precipitation (mm) |      |       |       |         | Number of days with precipitation (VI-IX) | Vineyard location                                               |
|------------------------|-----------------|----------------------------------|------|------|------|---------|----------------------------|------|-------|-------|---------|-------------------------------------------|-----------------------------------------------------------------|
|                        |                 | VI                               | VII  | VIII | IX   | (VI-IX) | VI                         | VII  | VIII  | IX    | (VI-IX) |                                           |                                                                 |
| Beli Manastir          | Continental     | 22.3                             | 23.6 | 22.4 | 14.3 | 20.7    | 62.7                       | 28.9 | 62.7  | 52.7  | 207.0   | 47                                        | Banovo brdo (Beli Manastir)                                     |
| Benkovac               | Mediterranean   | 21.8                             | 24.4 | 23.8 | 17.2 | 21.8    | 23.3                       | 44.5 | 2.2   | 110.0 | 180.1   | 15                                        | Korlat (Benkovac)                                               |
| Čakovec - Nedelišće    | Continental     | 21.4                             | 22.0 | 19.9 | 13.1 | 19.1    | 26.8                       | 89.1 | 109.3 | 156.8 | 382.0   | 44                                        | Železna gora (Štrigova);<br>Lopatinec (Sv. Juraj na Bregu)      |
| Dubrovnik - Čilipi     | Mediterranean   | 24.2                             | 27.3 | 25.8 | 19.4 | 24.2    | 19.2                       | 0.7  | 31.7  | 126.5 | 178.1   | 25                                        | Konavle                                                         |
| Ilok                   | Continental     | 22.7                             | 24.0 | 22.7 | 14.9 | 21.1    | 60.1                       | 33.0 | 80.9  | 102.8 | 276.7   | 48                                        | Principovac (Ilok)                                              |
| Jastrebarsko           | Continental     | 21.6                             | 21.9 | 20.6 | 14.0 | 19.5    | 81.2                       | 74.9 | 63.5  | 187.2 | 406.8   | 43                                        | Okić (Plešivica)                                                |
| Jelsa                  | Mediterranean   | 24.0                             | 26.4 | 25.1 | 18.4 | 23.5    | 15.8                       | 11.5 | 55.4  | 35.9  | 118.6   | 17                                        | Ivan Dolac (Island Hvar)                                        |
| Korčula                | Mediterranean   | 25.3                             | 27.8 | 26.0 | 20.3 | 24.8    | 28.3                       | 0.0  | 8.8   | 35.5  | 72.7    | 15                                        | Postup (Pelješac Peninsula)                                     |
| Kutjevo - Vidim        | Continental     | 21.3                             | 23.2 | 21.7 | 14.6 | 20.2    | 53.7                       | 32.4 | 83.6  | 106.8 | 276.5   | 51                                        | Hrnjavac (Kutjevo)                                              |
| Novigrad - Celega      | Mediterranean   | 22.7                             | 24.7 | 22.7 | 17.6 | 21.9    | 35.5                       | 1.2  | 62.5  | 161.1 | 260.3   | 41                                        | Dajla (Novigrad)                                                |
| Poreč                  | Mediterranean   | 22.5                             | 24.6 | 22.6 | 17.4 | 21.8    | 46.3                       | 6.9  | 64.0  | 188.8 | 306.0   | 36                                        | Mornarica (Poreč); Faragude<br>(Funtana); Radovani<br>(Višnjan) |
| Ston                   | Mediterranean   | –                                | 26.5 | 25.7 | –    | –       | 1.1                        | 5.9  | 8.9   | 15.4  | 31.3    | 6                                         | Ston (Pelješac Peninsula)                                       |
| Šibenik                | Mediterranean   | 24.3                             | 26.6 | 25.2 | 18.7 | 23.7    | 17.2                       | 26.9 | 51.5  | 25.5  | 121.0   | 32                                        | Primošten; Skradin                                              |
| Voćin                  | Continental     | 20.4                             | 21.0 | 20.3 | 12.9 | 18.7    | 46.2                       | 20.0 | 81.9  | 137.2 | 285.2   | 41                                        | Đulovac (Daruvvar)                                              |

–: not measured
