# Supplementary material for: Comparative Phenolic Profiles of Monovarietal Wines from Different Croatian Regions
Source: MDPI journal article supplement (doi:10.3390/app13053031), 2023-02-27
Supplement: s1 [file s1]

**Table S5.** Lipid peroxidation inhibitory activity (%) of selected phenolic compounds from wine

| Sample       | 0.78 µg/mL   | 1.56 µg/mL    | 3.13 µg/mL   | 6.25 µg/mL   | 12.5 µg/mL   | 25 µg/mL     | 50 µg/mL     | 100 µg/mL    | 200 µg/mL    |
|--------------|--------------|---------------|--------------|--------------|--------------|--------------|--------------|--------------|--------------|
| Quercetin    | 18.97 ± 6.16 | 47.56 ± 2.72  | 69.43 ± 6.62 | 78.67 ± 0.15 | 82.38 ± 0.23 | 83.93 ± 1.00 | 86.48 ± 2.09 | 87.03 ± 2.72 | 88.03 ± 1.53 |
| Myricetin    | 7.94 ± 1.78  | 72.99 ± 10.99 | 74.51 ± 1.11 | 82.17 ± 8.47 | 77.41 ± 5.33 | 81.31 ± 0.30 | 87.03 ± 0.75 | 86.55 ± 3.01 | 87.77 ± 1.59 |
| Gallic acid  | 13.05 ± 3.33 | 19.43 ± 0.06  | 34.84 ± 3.22 | 39.54 ± 0.28 | 52.95 ± 2.20 | 56.98 ± 2.26 | 64.60 ± 5.47 | 66.28 ± 4.28 | 67.55 ± 3.26 |
| Caffeic acid | 1.14 ± 0.46  | 1.12 ± 1.58   | 0.16 ± 0.23  | 0.56 ± 0.11  | 6.45 ± 0.29  | 6.13 ± 0.85  | 21.16 ± 1.92 | 47.58 ± 4.92 | 62.27 ± 4.22 |
| Catechin     | 1.03 ± 0.97  | 7.32 ± 1.02   | 10.55 ± 1.02 | 27.46 ± 1.77 | 48.35 ± 3.15 | 68.22 ± 1.25 | 70.01 ± 3.24 | 71.25 ± 6.22 | 71.85 ± 3.46 |
| Epicatechin  | 1.45 ± 1.53  | 8.85 ± 1.26   | 14.59 ± 0.51 | 31.32 ± 0.43 | 61.94 ± 4.57 | 73.87 ± 1.46 | 78.80 ± 2.22 | 77.55 ± 5.33 | 76.38 ± 2.12 |
| Resveratrol  | 4.67 ± 3.72  | 15.39 ± 0.38  | 39.23 ± 2.75 | 59.28 ± 5.81 | 66.23 ± 1.00 | 71.23 ± 1.32 | 75.91 ± 0.69 | 73.21 ± 1.23 | 74.45 ± 1.53 |

The data are expressed as mean values of three independent experiments ± standard deviation.
