# Supplementary material for: Comparative Phenolic Profiles of Monovarietal Wines from Different Croatian Regions
Source: MDPI journal article supplement (doi:10.3390/app13053031), 2023-02-27
Supplement: s1 [file s1]

**Table S2.** Validation parameters of HPLC method for determination of non-anthocyanin phenolic compounds in wine

| Compound                  | Retention time (min) | Retention time CV (%) | Calibration curve     | Coefficient of determination (R <sup>2</sup> ) | LOD (mg/L) | LOQ (mg/L) | $\lambda_{\text{DETECTION}}$ (nm) |
|---------------------------|----------------------|-----------------------|-----------------------|------------------------------------------------|------------|------------|-----------------------------------|
| Gallic acid               | 5,173                | 0,71                  | $y = 72,39x - 15,41$  | 0,9979                                         | 0,40       | 1,33       | 280                               |
| Procyanidin B1            | 8,318                | 0,64                  | $y = 13,01x - 7,98$   | 0,9975                                         | 1,61       | 5,36       | 280                               |
| Catechin                  | 9,851                | 0,38                  | $y = 18,77x - 11,37$  | 0,9981                                         | 1,31       | 4,37       | 280                               |
| Procyanidin B2            | 10,227               | 0,38                  | $y = 19,07x - 3,51$   | 0,9988                                         | 0,97       | 3,22       | 280                               |
| Chlorogenic acid          | 10,759               | 0,32                  | $y = 77,79x - 7,13$   | 1,0000                                         | 0,08       | 0,25       | 325                               |
| p-HBA                     | 11,425               | 0,33                  | $y = 38,01x - 1,2$    | 1,0000                                         | 0,03       | 0,11       | 280                               |
| Epicatechin               | 12,595               | 0,55                  | $y = 20,59x - 4,77$   | 0,9998                                         | 0,47       | 1,58       | 280                               |
| Caffeic acid              | 12,912               | 0,36                  | $y = 137,07x + 3,85$  | 1,0000                                         | 0,05       | 0,17       | 325                               |
| Syringic acid             | 14,144               | 0,29                  | $y = 74,3x - 1,17$    | 1,0000                                         | 0,08       | 0,27       | 280                               |
| p-Coumaric acid           | 18,865               | 0,31                  | $y = 129,84x + 0,39$  | 1,0000                                         | 0,03       | 0,09       | 325                               |
| Ferulic acid              | 21,667               | 0,32                  | $y = 139,6x - 0,55$   | 1,0000                                         | 0,01       | 0,03       | 325                               |
| o-Coumaric acid           | 32,580               | 0,24                  | $y = 143,09x + 1,9$   | 1,0000                                         | 0,03       | 0,09       | 280                               |
| Rutin                     | 33,906               | 0,38                  | $y = 40,2x + 2,78$    | 1,0000                                         | 0,02       | 0,07       | 360                               |
| <i>trans</i> -Resveratrol | 34,123               | 0,67                  | $y = 185,78x + 17,29$ | 1,0000                                         | 0,39       | 1,31       | 325                               |
| Myricetin                 | 36,751               | 0,27                  | $y = 85,7x - 22,55$   | 0,9993                                         | 0,76       | 2,53       | 360                               |
| Quercitrin                | 37,972               | 0,26                  | $y = 49,54x - 3,93$   | 1,0000                                         | 0,07       | 0,24       | 360                               |
| <i>cis</i> -Resveratrol   | 39,883               | 0,12                  | $y = 185,66x + 14,12$ | 0,9999                                         | 0,17       | 0,55       | 280                               |
| Quercetin                 | 42,638               | 0,20                  | $y = 93,14x - 43,46$  | 0,9995                                         | 0,64       | 2,12       | 360                               |
| Naringenin                | 43,335               | 0,25                  | $y = 80,45x - 2,26$   | 1,0000                                         | 0,04       | 0,13       | 280                               |
| Luteolin                  | 44,516               | 0,22                  | $y = 103,79x - 7,31$  | 1,0000                                         | 0,08       | 0,28       | 360                               |
| Kaempferol                | 46,651               | 0,14                  | $y = 101,85x - 8,51$  | 1,0000                                         | 0,11       | 0,36       | 360                               |
| Apigenin                  | 47,703               | 0,13                  | $y = 102,77x - 0,93$  | 1,0000                                         | 0,02       | 0,08       | 325                               |
