# Supplementary material for: Comparative Phenolic Profiles of Monovarietal Wines from Different Croatian Regions
Source: MDPI journal article supplement (doi:10.3390/app13053031), 2023-02-27
Supplement: s1 [file s1]

**Table S3.** DPPH radical scavenging activity (%) of selected phenolic compounds from wine in comparison with a reference antioxidant

| Sample       | 0.20 µg/mL   | 0.39 µg/mL   | 0.78 µg/mL   | 1.56 µg/mL   | 3.13 µg/mL   | 6.25 µg/mL   | 12.5 µg/mL   | 25 µg/mL     | 50 µg/mL     | 100 µg/mL    |
|--------------|--------------|--------------|--------------|--------------|--------------|--------------|--------------|--------------|--------------|--------------|
| Quercetin    | 13.60 ± 1.38 | 29.59 ± 1.78 | 46.93 ± 1.70 | 78.74 ± 2.27 | 94.22 ± 0.03 | 94.90 ± 0.03 | 94.90 ± 0.03 | 94.56 ± 0.03 | 94.90 ± 0.02 | 95.24 ± 0.02 |
| Myricetin    | 16.30 ± 4.48 | 25.54 ± 4.69 | 53.27 ± 4.86 | 83.87 ± 0.44 | 89.75 ± 0.69 | 88.74 ± 1.64 | 88.07 ± 0.69 | 87.23 ± 1.40 | 89.41 ± 0.21 | 88.40 ± 0.21 |
| Gallic acid  | 33.92 ± 1.02 | 61.78 ± 1.63 | 92.97 ± 1.20 | 94.15 ± 0.08 | 94.35 ± 0.20 | 94.55 ± 0.47 | 94.54 ± 0.07 | 94.35 ± 0.20 | 94.93 ± 0.07 | 95.32 ± 0.06 |
| Caffeic acid | 14.74 ± 4.87 | 31.10 ± 5.21 | 63.46 ± 1.93 | 88.80 ± 2.42 | 93.01 ± 0.95 | 93.80 ± 2.06 | 94.60 ± 0.92 | 95.61 ± 0.50 | 96.01 ± 0.51 | 95.61 ± 0.06 |
| Catechin     | 8.75 ± 3.93  | 18.25 ± 1.63 | 35.19 ± 0.70 | 56.24 ± 0.67 | 90.13 ± 2.92 | 93.11 ± 0.28 | 93.11 ± 0.28 | 92.92 ± 0.02 | 91.43 ± 0.02 | 91.43 ± 0.02 |
| Epicatechin  | 6.11 ± 2.04  | 12.44 ± 1.08 | 21.81 ± 2.78 | 43.30 ± 0.40 | 79.91 ± 2.00 | 92.71 ± 0.70 | 92.33 ± 0.17 | 91.76 ± 0.45 | 92.35 ± 0.92 | 91.76 ± 0.45 |
| Resveratrol  | 2.59 ± 0.80  | 6.60 ± 1.54  | 10.16 ± 2.34 | 17.74 ± 2.19 | 30.72 ± 1.65 | 47.87 ± 3.01 | 68.25 ± 1.47 | 82.44 ± 0.22 | 87.84 ± 1.74 | 92.21 ± 0.44 |
| Trolox       | 2.17 ± 0.75  | 9.22 ± 1.05  | 15.32 ± 0.80 | 34.59 ± 1.44 | 61.44 ± 1.12 | 74.23 ± 0.19 | 89.55 ± 0.03 | 93.51 ± 0.02 | 94.59 ± 0.01 | 15.32 ± 0.80 |

The data are expressed as mean values of three independent experiments ± standard deviation.
