# Supplementary material for: Comparative Phenolic Profiles of Monovarietal Wines from Different Croatian Regions
Source: MDPI journal article supplement (doi:10.3390/app13053031), 2023-02-27
Supplement: s1 [file s1]

**Table S4.** NO scavenging activity (%) of selected phenolic compounds from wine in comparison with a reference antioxidant

| Sample       | 6.25 µg/mL   | 12.5 µg/mL   | 25 µg/mL     | 50 µg/mL     | 100 µg/mL    | 200 µg/mL    | 400 µg/mL    |
|--------------|--------------|--------------|--------------|--------------|--------------|--------------|--------------|
| Quercetin    | 16.51 ± 2.59 | 27.16 ± 0.11 | 62.17 ± 0.81 | 80.52 ± 0.41 | 83.90 ± 0.74 | 84.10 ± 0.20 | 84.00 ± 0.07 |
| Myricetin    | 8.15 ± 0.12  | 25.96 ± 1.09 | 62.31 ± 2.24 | 75.90 ± 1.55 | 75.85 ± 1.62 | 76.01 ± 2.38 | 75.53 ± 1.83 |
| Gallic acid  | 28.02 ± 5.37 | 59.22 ± 1.61 | 79.39 ± 2.51 | 80.46 ± 2.32 | 79.93 ± 2.70 | 79.77 ± 2.36 | 80.92 ± 2.52 |
| Caffeic acid | 16.55 ± 1.24 | 31.63 ± 0.37 | 67.42 ± 2.11 | 82.50 ± 0.00 | 83.73 ± 0.26 | 83.93 ± 0.50 | 85.60 ± 0.12 |
| Catechin     | 4.63 ± 6.55  | 16.13 ± 5.41 | 42.18 ± 0.10 | 78.78 ± 0.03 | 81.61 ± 0.50 | 82.00 ± 0.44 | 82.08 ± 0.03 |
| Epicatechin  | 12.72 ± 4.85 | 26.06 ± 0.20 | 60.06 ± 0.81 | 80.22 ± 0.56 | 81.20 ± 0.13 | 81.69 ± 0.04 | 81.55 ± 1.00 |
| Resveratrol  | 18.53 ± 2.87 | 32.28 ± 0.98 | 46.80 ± 3.70 | 58.83 ± 0.65 | 64.71 ± 1.34 | 68.92 ± 1.66 | 72.24 ± 1.90 |
| Trolox       | 1.02 ± 0.35  | 1.10 ± 0.94  | 1.16 ± 1.64  | 56.64 ± 6.29 | 84.38 ± 0.01 | 84.02 ± 1.99 | 84.16 ± 0.58 |

The data are expressed as mean values of three independent experiments ± standard deviation.
